# Supplementary material for: Microwave spectroscopic and computational analyses of the phenylacetylene⋯methanol complex: insights into intermolecular interactions
Source: Royal Society of Chemistry journal article supplement (doi:10.1039/d4cp01916d), 2024-01-01
Supplement: d4cp01916d1.pdf [file d4cp01916d1.pdf]

# Microwave Spectroscopic and Computational Analyses of the Phenylacetylene···Methanol Complex: Insights into Intermolecular Interactions

*Surabhi Gupta<sup>a</sup>, Charlotte N. Cummings<sup>b</sup>, Nicholas R. Walker<sup>b</sup> and Elangannan Arunan<sup>a\*</sup>*

<sup>a</sup>Department of Inorganic and Physical Chemistry, Indian Institute of Science Bangalore, 560012,  
India

<sup>b</sup>Chemistry-School of Natural and Environmental Sciences, Newcastle University, Bedson Building,  
Newcastle-upon-Tyne NE1 7RU, United Kingdom

Email: [arunan@iisc.ac.in](mailto:arunan@iisc.ac.in)

**Supplementary Information:**

*Table S1: Experimentally observed rotational transition and their assignments for the  $C_6H_5CCH \cdots CH_3OH$  complex.*

| Transitions               | A-State     |                 | E-State     |                 |
|---------------------------|-------------|-----------------|-------------|-----------------|
|                           | $\nu_{obs}$ | $\nu_{obs-cal}$ | $\nu_{obs}$ | $\nu_{obs-cal}$ |
| 2 1 2 $\rightarrow$ 1 1 1 | 2674.841    | 0.007           | --          | --              |
| 1 1 0 $\rightarrow$ 0 0 0 | 2751.909    | 0.005           | 2752.338    | -0.007          |
| 2 0 2 $\rightarrow$ 1 0 1 | 2827.838    | 0.000           | 2826.037    | 0.005           |
| 4 2 3 $\rightarrow$ 4 1 3 | 2916.086    | 0.014           | 2916.819    | -0.011          |
| 2 1 1 $\rightarrow$ 1 1 0 | 3015.822    | 0.002           | 3015.006    | 0.001           |
| 4 2 2 $\rightarrow$ 4 1 3 | 3166.729    | -0.005          | --          | --              |
| 3 0 3 $\rightarrow$ 2 1 2 | 3193.478    | -0.003          | --          | --              |
| 3 2 2 $\rightarrow$ 3 1 2 | 3232.010    | 0.007           | 3230.366    | -0.003          |
| 2 2 1 $\rightarrow$ 2 1 1 | 3476.099    | 0.007           | 3467.847    | -0.005          |
| 2 2 0 $\rightarrow$ 2 1 1 | 3493.570    | 0.013           | --          | --              |
| 9 2 7 $\rightarrow$ 9 2 8 | 3503.176    | 0.001           | --          | --              |
| 4 0 4 $\rightarrow$ 3 1 2 | 3695.687    | 0.012           | --          | --              |
| 2 1 2 $\rightarrow$ 1 0 1 | 3833.575    | 0.000           | 3834.746    | -0.005          |
| 3 1 3 $\rightarrow$ 2 1 2 | 4001.784    | 0.002           | 4003.048    | 0.000           |
| 2 2 0 $\rightarrow$ 2 1 2 | 4005.049    | 0.008           | --          | --              |
| 3 0 3 $\rightarrow$ 2 0 2 | 4199.220    | 0.002           | 4195.706    | 0.002           |
| 3 2 2 $\rightarrow$ 3 1 3 | 4253.832    | 0.008           | 4249.064    | -0.007          |
| 3 2 2 $\rightarrow$ 2 2 1 | 4268.033    | 0.003           | 4273.546    | 0.003           |
| 5 1 4 $\rightarrow$ 4 2 2 | 4283.618    | 0.013           | 4278.869    | -0.050          |
| 3 2 1 $\rightarrow$ 2 2 0 | 4336.692    | -0.006          | 4329.521    | 0.000           |
| 3 2 1 $\rightarrow$ 3 1 3 | 4339.962    | 0.006           | 4340.359    | -0.016          |
| 2 1 1 $\rightarrow$ 1 0 1 | 4345.061    | 0.002           | 4345.467    | -0.007          |
| 5 0 5 $\rightarrow$ 4 1 3 | 4510.777    | -0.002          | --          | --              |
| 3 1 2 $\rightarrow$ 2 1 1 | 4512.123    | 0.004           | 4511.031    | 0.005           |
| 4 0 4 $\rightarrow$ 3 1 3 | 4717.498    | 0.002           | --          | --              |

|               |          |        |          |        |
|---------------|----------|--------|----------|--------|
| 4 2 2 → 4 1 4 | 4863.771 | 0.003  | --       | --     |
| 3 1 3 → 2 0 2 | 5007.522 | 0.003  | 5011.761 | -0.006 |
| 7 3 5 → 7 2 5 | 5043.567 | 0.000  | 5042.878 | -0.011 |
| 4 1 4 → 3 1 3 | 5317.678 | 0.003  | 5321.644 | 0.001  |
| 6 3 4 → 6 2 4 | 5480.410 | 0.004  | 5476.219 | 0.010  |
| 4 0 4 → 3 0 3 | 5525.800 | 0.003  | 5518.885 | -0.001 |
| 5 2 3 → 5 1 5 | 5621.210 | 0.006  | --       | --     |
| 4 2 3 → 3 2 2 | 5676.961 | 0.003  | 5677.705 | 0.003  |
| 4 3 2 → 3 3 1 | 5722.617 | -0.002 | 5724.548 | 0.026  |
| 4 3 1 → 3 3 0 | 5729.323 | 0.000  | 5725.029 | -0.019 |
| 6 1 5 → 5 2 3 | 5780.008 | 0.028  | --       | --     |
| 5 3 3 → 5 2 3 | 5808.497 | 0.006  | 5797.215 | 0.008  |
| 4 2 2 → 3 2 1 | 5841.485 | -0.001 | 5838.612 | 0.004  |
| 4 1 3 → 3 1 2 | 5992.891 | 0.003  | 5991.252 | 0.011  |
| 4 3 2 → 4 2 2 | 6024.618 | -0.004 | 6005.570 | -0.003 |
| 3 1 2 → 2 0 2 | 6029.343 | 0.003  | --       | --     |
| 3 3 1 → 3 2 1 | 6143.491 | 0.002  | --       | --     |
| 3 3 0 → 3 2 1 | 6144.614 | 0.000  | --       | --     |
| 3 3 0 → 3 2 2 | 6230.757 | 0.010  | --       | --     |
| 4 3 1 → 4 2 3 | 6283.095 | -0.017 | --       | --     |
| 5 3 2 → 5 2 4 | 6394.379 | -0.020 | --       | --     |
| 2 2 1 → 1 1 0 | 6491.915 | 0.002  | --       | --     |
| 2 2 0 → 1 1 0 | 6509.379 | 0.002  | 6482.864 | 0.007  |
| 5 1 5 → 4 1 4 | 6621.112 | 0.001  | 6631.209 | -0.006 |
| 2 2 1 → 1 1 1 | 6662.414 | 0.004  | 6653.836 | -0.001 |
| 2 2 0 → 1 1 1 | 6679.885 | 0.011  | --       | --     |
| 5 0 5 → 4 0 4 | 6807.994 | 0.002  | 6794.241 | -0.003 |
| 5 2 4 → 4 2 3 | 7074.246 | 0.004  | 7073.758 | 0.015  |
| 5 3 3 → 4 3 2 | 7162.420 | 0.003  | 7168.254 | 0.037  |
| 5 3 2 → 4 3 1 | 7185.525 | -0.004 | 7176.774 | -0.017 |
| 5 1 5 → 4 0 4 | 7221.290 | 0.000  | --       | --     |
| 5 2 3 → 4 2 2 | 7378.557 | 0.009  | 7376.599 | 0.016  |

|               |           |        |           |        |
|---------------|-----------|--------|-----------|--------|
| 5 1 4 → 4 1 3 | 7450.348  | 0.010  | 7447.968  | 0.009  |
| 6 1 6 → 5 1 5 | 7912.137  | -0.008 | 7933.091  | -0.009 |
| 4 2 2 → 3 1 2 | 9159.610  | -0.012 | 9160.259  | -0.022 |
| 7 1 7 → 6 1 6 | 9192.020  | -0.019 | 9224.673  | -0.003 |
| 7 0 7 → 6 0 6 | 9295.237  | -0.014 | --        | --     |
| 8 1 8 → 7 1 7 | 10462.766 | -0.023 | 10499.712 | 0.006  |
| 8 0 8 → 7 0 7 | 10529.847 | -0.028 | 10486.925 | -0.009 |
| 7 2 5 → 6 2 4 | 10478.934 | 0.011  | 10476.565 | 0.003  |
| 7 1 6 → 6 2 5 | 8134.095  | 0.000  | 8123.680  | 0.004  |
| 6 1 6 → 5 0 5 | 8325.425  | -0.018 | --        | --     |
| 8 1 7 → 7 1 6 | 11587.576 | 0.025  | 11579.838 | 0.011  |
| 6 0 6 → 5 0 5 | 8058.715  | -0.011 | 8033.366  | -0.002 |
| 6 1 5 → 5 1 4 | 8874.930  | 0.007  | 8871.543  | -0.002 |
| 6 2 4 → 5 2 3 | 8931.475  | -0.011 | 8929.484  | -0.003 |
| 7 0 7 → 6 1 6 | 9028.527  | -0.006 | --        | --     |

Table S2: Experimentally observed rotational transition and their assignments for the  $C_6H_5CCH \cdots CH_3OD$  complex.

| Transitions                       | A-State     |                 | E-State     |                 |
|-----------------------------------|-------------|-----------------|-------------|-----------------|
|                                   | $\nu_{obs}$ | $\nu_{obs-cal}$ | $\nu_{obs}$ | $\nu_{obs-cal}$ |
| 1 <sub>11</sub> → 0 <sub>00</sub> | 2582.175    | 0.012           | --          | --              |
| 2 <sub>12</sub> → 1 <sub>11</sub> | 2644.110    | -0.035          | --          | --              |
| 1 <sub>10</sub> → 0 <sub>00</sub> | 2748.775    | -0.007          | 2749.012    | 0.003           |
| 2 <sub>02</sub> → 1 <sub>01</sub> | 2794.261    | -0.006          | 2793.176    | -0.010          |
| 2 <sub>11</sub> → 1 <sub>10</sub> | 2977.379    | 0.004           | 2976.878    | 0.013           |
| 2 <sub>12</sub> → 1 <sub>01</sub> | 3820.910    | -0.016          | 3821.489    | -0.005          |
| 3 <sub>13</sub> → 2 <sub>12</sub> | 3956.335    | 0.003           | 3956.824    | 0.001           |
| 3 <sub>03</sub> → 2 <sub>02</sub> | 4151.204    | -0.004          | 4149.152    | -0.002          |
| 3 <sub>22</sub> → 2 <sub>21</sub> | 4216.191    | 0.013           | 4219.458    | 0.017           |
| 3 <sub>21</sub> → 2 <sub>20</sub> | 4281.025    | 0.016           | 4276.589    | 0.030           |
| 2 <sub>11</sub> → 1 <sub>01</sub> | 4320.778    | 0.002           | 4320.977    | 0.007           |

|                             |          |        |          |        |
|-----------------------------|----------|--------|----------|--------|
| $3_{12} \rightarrow 2_{11}$ | 4455.117 | -0.015 | 4454.413 | -0.010 |
| $3_{13} \rightarrow 2_{02}$ | 4983.000 | 0.010  | 4985.130 | 0.000  |
| $4_{14} \rightarrow 3_{13}$ | 5258.032 | 0.002  | 5259.890 | 0.001  |
| $4_{04} \rightarrow 3_{03}$ | 5465.460 | 0.003  | 5461.531 | 0.002  |
| $6_{34} \rightarrow 6_{24}$ | 5592.913 | 0.000  | --       | --     |
| $4_{23} \rightarrow 3_{22}$ | 5608.600 | -0.007 | 5608.753 | -0.008 |
| $4_{32} \rightarrow 3_{31}$ | 5651.775 | 0.015  | --       | --     |
| $4_{31} \rightarrow 3_{30}$ | 5657.863 | 0.001  | 5654.315 | -0.009 |
| $4_{22} \rightarrow 3_{21}$ | 5764.340 | -0.018 | 5762.665 | -0.006 |
| $4_{13} \rightarrow 3_{12}$ | 5918.318 | -0.002 | 5917.271 | 0.001  |
| $3_{12} \rightarrow 2_{02}$ | 5981.639 | -0.002 | 5982.201 | -0.006 |
| $4_{14} \rightarrow 3_{03}$ | 6089.814 | 0.001  | --       | --     |
| $5_{05} \rightarrow 4_{14}$ | 6112.264 | 0.002  | --       | --     |
| $5_{15} \rightarrow 4_{14}$ | 6547.833 | -0.003 | 6552.975 | 0.001  |
| $5_{05} \rightarrow 4_{04}$ | 6736.621 | 0.002  | 6728.896 | 0.000  |
| $5_{24} \rightarrow 4_{23}$ | 6990.037 | -0.013 | 6989.497 | -0.002 |
| $5_{33} \rightarrow 4_{32}$ | 7073.534 | 0.004  | 7078.131 | 0.005  |
| $5_{32} \rightarrow 4_{31}$ | 7094.590 | 0.001  | 7087.912 | -0.015 |
| $5_{23} \rightarrow 4_{22}$ | 7279.388 | 0.000  | 7278.132 | -0.003 |
| $5_{14} \rightarrow 4_{13}$ | 7359.715 | 0.017  | 7358.216 | 0.008  |

Table S3: Experimentally observed rotational transition and their assignments for the  $C_6H_5CCD \cdots CH_3OH$  complex.

| Transitions                 | E-State     |                 |             |                 |
|-----------------------------|-------------|-----------------|-------------|-----------------|
|                             | $\nu_{obs}$ | $\nu_{obs-cal}$ | $\nu_{obs}$ | $\nu_{obs-cal}$ |
| $2_{12} \rightarrow 1_{11}$ | 2635.172    | -0.002          | 2635.666    | -0.018          |
| $2_{02} \rightarrow 1_{01}$ | 2790.078    | 0.002           | 2788.263    | 0.010           |
| $2_{11} \rightarrow 1_{10}$ | 2983.027    | 0.000           | 2982.196    | -0.002          |
| $3_{22} \rightarrow 3_{12}$ | 3057.972    | -0.003          | 3056.206    | 0.002           |
| $3_{03} \rightarrow 2_{12}$ | 3191.811    | 0.007           | 3185.137    | -0.005          |

|                               |          |        |          |        |
|-------------------------------|----------|--------|----------|--------|
| $2_{12} \rightarrow 1_{01}$   | 3737.278 | 0.001  | 3738.490 | -0.001 |
| $3_{13} \rightarrow 2_{12}$   | 3941.414 | 0.000  | 3942.873 | 0.007  |
| $3_{03} \rightarrow 2_{02}$   | 4139.01  | 0.005  | 4135.382 | 0.002  |
| $3_{22} \rightarrow 2_{21}$   | 4213.658 | -0.020 | 4219.575 | 0.005  |
| $2_{11} \rightarrow 1_{01}$   | 4259.056 | -0.004 | 4259.475 | -0.011 |
| $3_{12} \rightarrow 2_{11}$   | 4461.871 | 0.001  | 4460.776 | 0.000  |
| $3_{13} \rightarrow 2_{02}$   | 4888.625 | 0.010  | 4893.103 | -0.002 |
| $4_{14} \rightarrow 3_{13}$   | 5235.776 | -0.002 | 5240.274 | 0.001  |
| $4_{04} \rightarrow 3_{03}$   | 5440.198 | 0.000  | 5432.862 | 0.001  |
| $4_{23} \rightarrow 3_{22}$   | 5603.285 | -0.012 | 5604.167 | 0.002  |
| $4_{31} \rightarrow 3_{30}$   | 5660.493 | 0.003  | 5655.775 | -0.015 |
| $4_{22} \rightarrow 3_{21}$   | 5780.984 | 0.005  | 5778.073 | 0.006  |
| $4_{13} \rightarrow 3_{12}$   | 5923.645 | -0.009 | 5921.996 | 0.000  |
| $3_{12} \rightarrow 2_{02}$   | 5930.859 | 0.005  | 5932.014 | 0.005  |
| $4_{14} \rightarrow 3_{03}$   | 5985.38  | -0.007 | 5998.002 | 0.005  |
| $2_{20} \rightarrow 1_{10}$   | 6308.194 | -0.005 | 6317.367 | -0.001 |
| $7_{34} \rightarrow 7_{26}$   | 6742.715 | -0.002 | --       | --     |
| $5_{24} \rightarrow 4_{23}$   | 6980.282 | 0.000  | 6979.908 | 0.004  |
| $11_{39} \rightarrow 10_{47}$ | 6982.021 | -0.001 | --       | --     |
| $5_{33} \rightarrow 4_{32}$   | 7075.431 | 0.013  | 7304.185 | 0.002  |
| $5_{23} \rightarrow 4_{22}$   | 7306.128 | -0.003 | --       | --     |
| $3_{21} \rightarrow 2_{11}$   | 7613.412 | 0.011  | --       | --     |
| $6_{16} \rightarrow 5_{15}$   | 7785.148 | 0.008  | 7808.210 | -0.003 |
| $6_{06} \rightarrow 5_{05}$   | 7921.241 | -0.007 | --       | --     |

Table S4: Experimentally observed rotational transition and their assignments for the  $C_6H_5CCH \cdots ^{13}CH_3OH$  complex.

| Transitions                 | A-State          |                      | E-State          |                      |
|-----------------------------|------------------|----------------------|------------------|----------------------|
|                             | V <sub>obs</sub> | V <sub>obs-cal</sub> | V <sub>obs</sub> | V <sub>obs-cal</sub> |
| $1_{10} \rightarrow 0_{00}$ | 2975.255         | -0.003               | 2721.880         | -0.001               |

|                             |          |        |          |        |
|-----------------------------|----------|--------|----------|--------|
| $2_{02} \rightarrow 1_{01}$ | 2791.584 | 0.005  | 2789.806 | -0.001 |
| $2_{11} \rightarrow 1_{10}$ | 2975.255 | 0.002  | 2974.473 | -0.001 |
| $3_{22} \rightarrow 3_{12}$ | 3212.272 | -0.004 | 3210.961 | 0.006  |
| $2_{21} \rightarrow 2_{11}$ | 3451.221 | -0.002 | 3443.889 | -0.003 |
| $2_{20} \rightarrow 2_{11}$ | 3468.075 | -0.001 | 3476.825 | -0.002 |
| $4_{04} \rightarrow 3_{12}$ | 3651.260 | 0.004  | 3640.049 | 0.007  |
| $2_{12} \rightarrow 1_{01}$ | 3792.125 | 0.007  | 3793.274 | -0.004 |
| $3_{13} \rightarrow 2_{12}$ | 3952.390 | 0.004  | 3953.580 | -0.002 |
| $2_{20} \rightarrow 2_{12}$ | 3968.472 | 0.009  | 3976.447 | -0.004 |
| $3_{03} \rightarrow 2_{02}$ | 4146.289 | 0.004  | 4142.857 | -0.001 |
| $3_{22} \rightarrow 3_{13}$ | 4211.972 | 0.013  | 4207.605 | 0.001  |
| $3_{22} \rightarrow 2_{21}$ | 4212.732 | -0.002 | 4217.673 | 0.003  |
| $3_{21} \rightarrow 2_{20}$ | 4279.031 | 0.004  | 4272.432 | -0.005 |
| $2_{11} \rightarrow 1_{01}$ | 4292.506 | 0.001  | 4292.899 | -0.003 |
| $3_{21} \rightarrow 3_{13}$ | 4295.099 | -0.005 | 4295.301 | -0.004 |
| $9_{27} \rightarrow 9_{18}$ | 4332.372 | -0.002 | 4450.605 | -0.002 |
| $3_{12} \rightarrow 2_{11}$ | 4451.682 | 0.001  | 4440.807 | -0.008 |
| $5_{05} \rightarrow 4_{13}$ | 4463.654 | 0.005  | --       | --     |
| $4_{23} \rightarrow 4_{14}$ | 4563.263 | 0.004  | --       | --     |
| $4_{22} \rightarrow 4_{14}$ | 4805.410 | 0.002  | 4799.166 | 0.008  |
| $3_{13} \rightarrow 2_{02}$ | 4952.922 | -0.002 | 4957.094 | 0.040  |
| $4_{14} \rightarrow 3_{13}$ | 5252.411 | 0.001  | 5256.188 | -0.004 |
| $4_{04} \rightarrow 3_{03}$ | 5457.579 | 0.001  | 5450.886 | 0.000  |
| $4_{23} \rightarrow 3_{22}$ | 5603.708 | -0.002 | 5604.249 | -0.007 |
| $4_{32} \rightarrow 3_{31}$ | 5647.826 | 0.000  | 5649.597 | 0.021  |
| $4_{31} \rightarrow 3_{30}$ | 5654.205 | -0.001 | 5650.072 | -0.031 |
| $4_{22} \rightarrow 3_{21}$ | 5762.721 | 0.007  | 5760.047 | 0.002  |
| $5_{33} \rightarrow 5_{23}$ | 5771.138 | -0.009 | --       | --     |
| $4_{13} \rightarrow 3_{12}$ | 5913.154 | 0.002  | 5911.526 | -0.003 |
| $3_{12} \rightarrow 2_{02}$ | 5952.606 | -0.001 | 5953.695 | -0.007 |
| $4_{14} \rightarrow 3_{03}$ | 6059.039 | -0.011 | 6070.375 | -0.013 |
| $3_{31} \rightarrow 3_{21}$ | 6095.394 | 0.007  | --       | --     |

|                             |          |        |          |        |
|-----------------------------|----------|--------|----------|--------|
| $2_{20} \rightarrow 1_{10}$ | 6443.333 | 0.004  | 6451.296 | -0.004 |
| $5_{15} \rightarrow 4_{14}$ | 6540.351 | 0.000  | --       | --     |
| $2_{21} \rightarrow 1_{11}$ | 6593.271 | -0.003 | --       | --     |
| $5_{05} \rightarrow 4_{04}$ | 6725.546 | 0.001  | 6712.304 | 0.002  |
| $5_{24} \rightarrow 4_{23}$ | 6983.439 | -0.008 | --       | --     |
| $5_{33} \rightarrow 4_{32}$ | 7068.684 | -0.001 | 7074.050 | 0.020  |
| $5_{23} \rightarrow 4_{22}$ | 7278.044 | 0.006  | 7276.145 | 0.002  |
| $5_{14} \rightarrow 4_{13}$ | 7352.188 | -0.004 | --       | --     |
| $4_{13} \rightarrow 3_{03}$ | 7719.463 | -0.011 | 7722.370 | -0.004 |
| $3_{21} \rightarrow 2_{11}$ | 7747.101 | -0.002 | 7749.264 | 0.000  |
| $6_{16} \rightarrow 5_{15}$ | 7816.217 | 0.000  | --       | --     |

Table S5: Experimentally observed rotational transition and their assignments for the  $C_6H_5CCH \cdots CD_3OD$  complex.

| Transitions                 | A-State     |                 |
|-----------------------------|-------------|-----------------|
|                             | $\nu_{obs}$ | $\nu_{obs-cal}$ |
| $3_{22} \rightarrow 3_{12}$ | 3147.106    | -0.009          |
| $3_{13} \rightarrow 2_{12}$ | 3798.181    | 0.013           |
| $3_{03} \rightarrow 2_{02}$ | 3980.725    | 0.013           |
| $3_{22} \rightarrow 2_{21}$ | 4039.832    | -0.017          |
| $9_{27} \rightarrow 9_{18}$ | 4076.803    | 0.002           |
| $2_{11} \rightarrow 1_{01}$ | 4126.719    | -0.014          |
| $3_{12} \rightarrow 2_{11}$ | 4262.502    | -0.008          |
| $4_{14} \rightarrow 3_{13}$ | 5048.690    | 0.008           |
| $4_{23} \rightarrow 3_{22}$ | 5374.702    | 0.000           |
| $6_{15} \rightarrow 5_{23}$ | 5405.121    | -0.019          |
| $4_{22} \rightarrow 3_{21}$ | 5516.688    | 0.022           |
| $4_{13} \rightarrow 3_{12}$ | 5663.543    | -0.004          |
| $5_{32} \rightarrow 5_{23}$ | 5672.107    | 0.000           |
| $3_{12} \rightarrow 2_{02}$ | 5711.068    | 0.016           |



|                                     |          |        |
|-------------------------------------|----------|--------|
| 5 <sub>1 5</sub> → 4 <sub>1 4</sub> | 6288.302 | -0.020 |
| 2 <sub>2 1</sub> → 1 <sub>1 1</sub> | 6373.161 | 0.004  |
| 5 <sub>0 5</sub> → 4 <sub>0 4</sub> | 6467.771 | -0.011 |
| 7 <sub>1 6</sub> → 6 <sub>2 4</sub> | 6692.759 | 0.017  |
| 5 <sub>2 4</sub> → 4 <sub>2 3</sub> | 6699.600 | 0.017  |
| 5 <sub>2 3</sub> → 4 <sub>2 2</sub> | 6964.019 | -0.016 |
| 5 <sub>1 4</sub> → 4 <sub>1 3</sub> | 7044.882 | 0.003  |
| 9 <sub>2 8</sub> → 9 <sub>1 9</sub> | 7244.447 | -0.002 |
| 7 <sub>1 6</sub> → 6 <sub>2 5</sub> | 7588.900 | -0.002 |

Table S6: Cartesian coordinates (Å) for equilibrium geometry of PhAc...CH<sub>3</sub>OH complex for (M-P)<sub>Ph</sub> structure in the abc principal axes system optimised at MP2/aug-cc-pVDZ level of theory.

| Atoms | a      | b      | c      |
|-------|--------|--------|--------|
| C1    | 1.387  | -0.953 | -1.219 |
| C2    | 2.090  | -1.034 | -0.001 |
| C3    | 1.389  | -0.946 | 1.219  |
| C4    | -0.006 | -0.780 | 1.225  |
| C5    | -0.715 | -0.695 | 0.001  |
| C6    | -0.009 | -0.787 | -1.223 |
| H7    | 1.927  | -1.011 | -2.168 |
| H8    | 3.177  | -1.153 | -0.002 |
| H9    | 1.932  | -0.998 | 2.167  |
| H10   | -0.555 | -0.703 | 2.167  |
| H11   | -0.560 | -0.716 | -2.165 |
| C12   | -2.140 | -0.504 | 0.002  |
| C13   | -3.362 | -0.312 | 0.003  |
| H14   | -4.426 | -0.165 | 0.003  |
| C15   | -0.251 | 2.563  | -0.009 |
| H16   | -0.366 | 3.655  | -0.019 |
| H17   | -0.754 | 2.158  | 0.886  |

|     |        |       |        |
|-----|--------|-------|--------|
| H18 | -0.740 | 2.144 | -0.906 |
| O19 | 1.157  | 2.300 | 0.003  |
| H20 | 1.272  | 1.339 | 0.018  |

Table S7: Cartesian coordinates ( $\text{\AA}$ ) for equilibrium geometry of  $\text{PhAc}\cdots\text{CH}_3\text{OH}$  complex for  $(M-P)_{Ac}$  structure in the  $abc$  principal axes system optimised at MP2/aug-cc-pVDZ level of theory.

| Atoms | a      | b      | c      |
|-------|--------|--------|--------|
| C1    | -1.747 | -0.282 | -1.266 |
| C2    | -2.521 | -0.322 | -0.090 |
| C3    | -2.024 | 0.250  | 1.097  |
| C4    | -0.756 | 0.855  | 1.115  |
| C5    | 0.025  | 0.889  | -0.064 |
| C6    | -0.479 | 0.322  | -1.260 |
| H7    | -2.129 | -0.728 | -2.189 |
| H8    | -3.506 | -0.798 | -0.098 |
| H9    | -2.623 | 0.221  | 2.012  |
| H10   | -0.358 | 1.293  | 2.035  |
| H11   | 0.136  | 0.341  | -2.164 |
| C12   | 1.347  | 1.459  | -0.042 |
| C13   | 2.511  | 1.879  | -0.014 |
| H14   | 3.509  | 2.277  | 0.002  |
| C15   | 0.992  | -2.230 | 0.651  |
| H16   | 1.000  | -3.327 | 0.606  |
| H17   | 0.001  | -1.865 | 0.334  |
| H18   | 1.173  | -1.920 | 1.695  |
| O19   | 2.034  | -1.781 | -0.226 |
| H20   | 2.083  | -0.816 | -0.153 |

Table S8: Cartesian coordinates ( $\text{\AA}$ ) for equilibrium geometry of PhAc $\cdots$ CH<sub>3</sub>OH complex for (P-M)<sub>OH</sub> structure in the abc principal axes system optimised at MP2/aug-cc-pVDZ level of theory.

| Atoms | a      | b      | c      |
|-------|--------|--------|--------|
| C1    | 3.099  | -1.189 | 0.218  |
| C2    | 1.709  | -1.225 | 0.017  |
| C3    | 0.983  | -0.021 | -0.153 |
| C4    | 1.672  | 1.215  | -0.118 |
| C5    | 3.062  | 1.242  | 0.083  |
| C6    | 3.780  | 0.043  | 0.251  |
| H7    | 3.652  | -2.124 | 0.348  |
| H8    | 1.174  | -2.179 | -0.010 |
| H9    | 1.110  | 2.143  | -0.251 |
| H10   | 3.587  | 2.202  | 0.107  |
| H11   | 4.863  | 0.068  | 0.408  |
| C12   | -0.441 | -0.054 | -0.358 |
| C13   | -1.667 | -0.084 | -0.533 |
| H14   | -2.737 | -0.109 | -0.682 |
| C15   | -4.998 | 0.195  | 0.942  |
| H16   | -5.940 | -0.204 | 1.352  |
| H17   | -4.964 | 1.287  | 1.090  |
| H18   | -4.155 | -0.262 | 1.476  |
| O19   | -4.836 | -0.159 | -0.444 |
| H20   | -5.553 | 0.250  | -0.946 |

Table S9: Cartesian coordinates ( $\text{\AA}$ ) for equilibrium geometry of PhAc $\cdots$ CH<sub>3</sub>OH complex for (M-P)<sub>Ph</sub> structure in the abc principal axes system optimised at B3LYP-D3/aug-cc-pVDZ level of theory.

| Atoms | a     | b      | c      |
|-------|-------|--------|--------|
| C1    | 1.365 | -1.006 | -1.214 |

|     |        |        |        |
|-----|--------|--------|--------|
| C2  | 2.062  | -1.108 | -0.003 |
| C3  | 1.367  | -1.012 | 1.209  |
| C4  | -0.016 | -0.819 | 1.214  |
| C5  | -0.723 | -0.717 | 0.000  |
| C6  | -0.017 | -0.813 | -1.216 |
| H7  | 1.902  | -1.072 | -2.160 |
| H8  | 3.142  | -1.253 | -0.004 |
| H9  | 1.905  | -1.082 | 2.154  |
| H10 | -0.557 | -0.737 | 2.156  |
| H11 | -0.560 | -0.727 | -2.156 |
| C12 | -2.138 | -0.499 | 0.002  |
| C13 | -3.335 | -0.299 | 0.003  |
| H14 | -4.392 | -0.131 | 0.004  |
| C15 | -0.221 | 2.665  | -0.008 |
| H16 | -0.344 | 3.755  | -0.014 |
| H17 | -0.729 | 2.255  | 0.880  |
| H18 | -0.705 | 2.250  | -0.908 |
| O19 | 1.181  | 2.410  | 0.012  |
| H20 | 1.320  | 1.455  | 0.021  |

*Table S10: Cartesian coordinates ( $\text{\AA}$ ) for equilibrium geometry of  $\text{PhAc}\cdots\text{CH}_3\text{OH}$  complex for  $(M-P)_{Ac}$  structure in the  $abc$  principal axes system optimised at B3LYP-D3/aug-cc-pVDZ level of theory.*

| <b>Atoms</b> | <b>a</b> | <b>b</b> | <b>c</b> |
|--------------|----------|----------|----------|
| C1           | -1.488   | -1.513   | -0.476   |
| C2           | -2.699   | -1.026   | 0.026    |
| C3           | -2.789   | 0.3      | 0.461    |
| C4           | -1.676   | 1.138    | 0.393    |
| C5           | -0.454   | 0.652    | -0.113   |
| C6           | -0.368   | -0.684   | -0.55    |
| H7           | -1.414   | -2.547   | -0.815   |

|     |        |        |        |
|-----|--------|--------|--------|
| H8  | -3.571 | -1.679 | 0.081  |
| H9  | -3.731 | 0.685  | 0.854  |
| H10 | -1.743 | 2.172  | 0.729  |
| H11 | 0.577  | -1.064 | -0.934 |
| C12 | 0.684  | 1.519  | -0.182 |
| C13 | 1.644  | 2.264  | -0.236 |
| H14 | 2.477  | 2.932  | -0.289 |
| C15 | 2.861  | -1.225 | 0.962  |
| H16 | 3.18   | -2.272 | 1.034  |
| H17 | 1.821  | -1.15  | 1.322  |
| H18 | 3.507  | -0.615 | 1.614  |
| O19 | 2.978  | -0.849 | -0.408 |
| H20 | 2.674  | 0.064  | -0.494 |

*Table S11: Cartesian coordinates ( $\text{\AA}$ ) for equilibrium geometry of  $\text{PhAc}\cdots\text{CH}_3\text{OH}$  complex for  $(P-M)_{\text{OH}}$  structure in the  $abc$  principal axes system optimised at B3LYP-D3/aug-cc-pVDZ level of theory.*

| <b>Atoms</b> | <b>a</b> | <b>b</b> | <b>c</b> |
|--------------|----------|----------|----------|
| C1           | 3.184    | -1.059   | 0.287    |
| C2           | 1.806    | -1.220   | 0.145    |
| C3           | 0.981    | -0.105   | -0.111   |
| C4           | 1.573    | 1.170    | -0.221   |
| C5           | 2.952    | 1.322    | -0.077   |
| C6           | 3.763    | 0.210    | 0.177    |
| H7           | 3.811    | -1.930   | 0.485    |
| H8           | 1.354    | -2.207   | 0.231    |
| H9           | 0.940    | 2.034    | -0.419   |
| H10          | 3.397    | 2.314    | -0.165   |
| H11          | 4.841    | 0.333    | 0.289    |
| C12          | -0.434   | -0.267   | -0.257   |
| C13          | -1.636   | -0.405   | -0.375   |

|     |        |        |        |
|-----|--------|--------|--------|
| H14 | -2.700 | -0.525 | -0.484 |
| C15 | -5.004 | 0.670  | 0.660  |
| H16 | -5.979 | 0.608  | 1.168  |
| H17 | -4.902 | 1.658  | 0.183  |
| H18 | -4.209 | 0.561  | 1.407  |
| O19 | -4.827 | -0.396 | -0.280 |
| H20 | -5.495 | -0.324 | -0.971 |

Table S12: Normal modes of vibrations for the structures  $(M-P)_{Ph}$ ,  $(M-P)_{Ac}$ , and  $(P-M)_{OH}$  of the  $PhAc \cdots CH_3OH$  complex calculated at MP2/aug-cc-pVDZ level of theory.

| Modes (cm <sup>-1</sup> ) | $(M-P)_{Ph}$ | $(M-P)_{Ac}$ | $(P-M)_{OH}$ |
|---------------------------|--------------|--------------|--------------|
| 1                         | 38.1         | 32.1         | 8.4          |
| 2                         | 44.4         | 48.1         | 17.8         |
| 3                         | 53.0         | 66.9         | 29.1         |
| 4                         | 105.8        | 102.5        | 47.9         |
| 5                         | 124.1        | 112.1        | 73.3         |
| 6                         | 137.6        | 139.8        | 124.5        |
| 7                         | 144.9        | 145.2        | 147.9        |
| 8                         | 145.9        | 180.4        | 164.2        |
| 9                         | 321.3        | 331.5        | 314.4        |
| 10                        | 329.4        | 392.5        | 319.8        |
| 11                        | 397.6        | 410.4        | 397.6        |
| 12                        | 459.5        | 460.1        | 463.2        |
| 13                        | 495.0        | 494.7        | 496.8        |
| 14                        | 499.5        | 506.4        | 506.1        |
| 15                        | 562.3        | 570.9        | 615.5        |
| 16                        | 612.1        | 612.0        | 637.5        |
| 17                        | 614.7        | 614.7        | 689.5        |
| 18                        | 660.0        | 658.0        | 741.4        |
| 19                        | 750.8        | 745.4        | 750.9        |

|    |        |        |        |
|----|--------|--------|--------|
| 20 | 762.2  | 762.9  | 762.8  |
| 21 | 844.7  | 840.3  | 837.7  |
| 22 | 901.4  | 899.4  | 888.6  |
| 23 | 958.1  | 954.6  | 932.1  |
| 24 | 958.9  | 956.9  | 941.0  |
| 25 | 997.7  | 997.6  | 996.5  |
| 26 | 1037.1 | 1038.3 | 1035.6 |
| 27 | 1048.4 | 1046.7 | 1038.6 |
| 28 | 1080.1 | 1084.1 | 1072.8 |
| 29 | 1085.7 | 1087.8 | 1085.5 |
| 30 | 1164.9 | 1166.1 | 1164.3 |
| 31 | 1165.4 | 1167.7 | 1168.7 |
| 32 | 1183.5 | 1184.3 | 1183.0 |
| 33 | 1216.1 | 1214.9 | 1215.2 |
| 34 | 1306.6 | 1308.3 | 1304.9 |
| 35 | 1371.6 | 1377.0 | 1361.9 |
| 36 | 1429.4 | 1432.6 | 1427.0 |
| 37 | 1459.3 | 1459.1 | 1466.4 |
| 38 | 1479.3 | 1482.5 | 1477.8 |
| 39 | 1489.5 | 1490.3 | 1490.6 |
| 40 | 1490.6 | 1492.0 | 1493.3 |
| 41 | 1497.0 | 1500.3 | 1505.6 |
| 42 | 1598.5 | 1602.5 | 1601.4 |
| 43 | 1627.2 | 1629.8 | 1630.5 |
| 44 | 2104.6 | 2098.8 | 2093.2 |
| 45 | 3037.6 | 3041.8 | 3059.3 |
| 46 | 3114.0 | 3120.8 | 3142.5 |
| 47 | 3174.3 | 3174.3 | 3190.2 |
| 48 | 3206.8 | 3203.6 | 3200.7 |
| 49 | 3212.6 | 3211.4 | 3208.3 |
| 50 | 3221.0 | 3219.9 | 3217.8 |
| 51 | 3227.8 | 3227.0 | 3224.3 |

|    |        |        |        |
|----|--------|--------|--------|
| 52 | 3235.7 | 3233.7 | 3231.5 |
| 53 | 3479.1 | 3476.2 | 3390.1 |
| 54 | 3799.0 | 3792.1 | 3837.8 |

Table S13: Normal modes of vibrations for the structures  $(M-P)_{Ph}$ ,  $(M-P)_{Ac}$ , and  $(P-M)_{OH}$  of the  $PhAc \cdots CH_3OH$  complex calculated at B3LYP-D3/aug-cc-pVDZ level of theory. Frequency in  $cm^{-1}$ .

| Modes ( $cm^{-1}$ ) | $(M-P)_{Ph}$ | $(M-P)_{Ac}$ | $(P-M)_{OH}$ |
|---------------------|--------------|--------------|--------------|
| 1                   | 17.1         | 22.4         | 7.1          |
| 2                   | 34.9         | 48.9         | 21.8         |
| 3                   | 43.9         | 75.3         | 38.4         |
| 4                   | 91.0         | 99.8         | 51.9         |
| 5                   | 116.3        | 110.1        | 72.7         |
| 6                   | 127.4        | 118.7        | 113.5        |
| 7                   | 139.0        | 138.0        | 154.9        |
| 8                   | 152.9        | 162.2        | 175.4        |
| 9                   | 337.3        | 345.1        | 314.8        |
| 10                  | 338.8        | 413.2        | 347.1        |
| 11                  | 408.8        | 469.7        | 412.2        |
| 12                  | 469.5        | 496.5        | 472.2        |
| 13                  | 527.1        | 526.0        | 526.9        |
| 14                  | 534.4        | 533.0        | 543.9        |
| 15                  | 580.0        | 570.8        | 630.1        |
| 16                  | 629.3        | 630.0        | 704.9        |
| 17                  | 656.6        | 655.8        | 717.7        |
| 18                  | 704.5        | 709.6        | 769.0        |
| 19                  | 773.1        | 771.2        | 772.5        |
| 20                  | 778.5        | 776.4        | 778.4        |
| 21                  | 846.9        | 856.5        | 846.3        |
| 22                  | 926.3        | 942.3        | 927.7        |
| 23                  | 980.6        | 992.0        | 985.0        |



|    |        |        |        |
|----|--------|--------|--------|
| 24 | 999.2  | 1004.3 | 1004.3 |
| 25 | 1006.1 | 1009.2 | 1004.7 |
| 26 | 1043.8 | 1043.4 | 1032.4 |
| 27 | 1046.9 | 1048.0 | 1045.5 |
| 28 | 1081.1 | 1084.0 | 1073.1 |
| 29 | 1098.8 | 1104.7 | 1097.7 |
| 30 | 1154.5 | 1161.9 | 1157.9 |
| 31 | 1182.5 | 1182.4 | 1179.9 |
| 32 | 1198.4 | 1207.7 | 1196.7 |
| 33 | 1220.3 | 1216.0 | 1218.4 |
| 34 | 1314.4 | 1319.1 | 1312.8 |
| 35 | 1347.7 | 1354.4 | 1347.0 |
| 36 | 1369.1 | 1381.6 | 1355.3 |
| 37 | 1450.1 | 1449.2 | 1454.1 |
| 38 | 1459.6 | 1459.4 | 1457.9 |
| 39 | 1468.1 | 1467.0 | 1468.0 |
| 40 | 1477.1 | 1481.0 | 1479.3 |
| 41 | 1508.6 | 1511.7 | 1507.6 |
| 42 | 1606.4 | 1608.0 | 1606.3 |
| 43 | 1639.9 | 1641.5 | 1640.9 |
| 44 | 2208.2 | 2195.8 | 2194.7 |
| 45 | 2992.3 | 2991.6 | 3004.1 |
| 46 | 3048.1 | 3046.5 | 3065.7 |
| 47 | 3114.4 | 3113.2 | 3126.1 |
| 48 | 3178.7 | 3173.6 | 3170.8 |
| 49 | 3186.7 | 3183.4 | 3179.6 |
| 50 | 3196.3 | 3193.4 | 3190.8 |
| 51 | 3203.3 | 3201.0 | 3198.4 |
| 52 | 3208.1 | 3204.4 | 3202.9 |
| 53 | 3478.1 | 3473.3 | 3386.8 |
| 54 | 3816.1 | 3755.2 | 3829.7 |

---

Table S14: Experimental rotational constants (MHz), centrifugal distortion constants (kHz) and second moment obtained from the global fit containing A- and E- state transitions (fit includes transitions obtained from the CP-FTMW spectrometer).  $F_0$  is being fixed in this fit.

| Constants                    | PhAc $\cdots$ CH <sub>3</sub> OH | PhAc $\cdots$ CH <sub>3</sub> OD | PhAc-D $\cdots$ CH <sub>3</sub> OH | PhAc $\cdots$ <sup>13</sup> CH <sub>3</sub> OH |
|------------------------------|----------------------------------|----------------------------------|------------------------------------|------------------------------------------------|
| $A_0$                        | 1955.313(3)                      | 1962.814(7)                      | 1891.341(4)                        | 1935.974(5)                                    |
| $B_0$                        | 796.553(1)                       | 785.982(2)                       | 789.216(2)                         | 785.488(2)                                     |
| $C_0$                        | 625.9945(8)                      | 619.316(2)                       | 615.2275(1)                        | 618.630(1)                                     |
| $D_J$                        | 1.140(7)                         | 1.05(2)                          | 1.03(1)                            | 1.15(3)                                        |
| $D_{JK}$                     | -6.10(6)                         | -5.5(1)                          | -4.9(1)                            | -6.3(1)                                        |
| $D_K$                        | 17.0(3)                          | 52.4(8)                          | 18.1(8)                            | 19.2(6)                                        |
| $d_I$                        | -0.137(4)                        | -0.17(2)                         | -0.10(2)                           | -0.15(6)                                       |
| $D_{\pi 2J}$                 | -258(2)                          | -219(5)                          | -265(3)                            | -268(3)                                        |
| $D_{\pi 2K}$                 | 823(1)                           | 676(6)                           | 774(2)                             | 780(1)                                         |
| $V_3$ (cm <sup>-1</sup> )    | 200.0(1)                         | 217.8(3)                         | 200.6(1)                           | 200.7(1)                                       |
| $F_0$ (cm <sup>-1</sup> )    | [5.24] <sup>a</sup>              | [5.24] <sup>a</sup>              | [5.24] <sup>a</sup>                | [5.24] <sup>a</sup>                            |
| $\angle(i, a)$<br>(degree)   | 66.7(2)                          | 67.6(6)                          | 68.4(4)                            | 67.8(4)                                        |
| $\angle(i, b)$<br>(degree)   | 24.2(2)                          | 23.1(6)                          | 22.7(4)                            | 23.0(3)                                        |
| $\angle(i, c)$<br>(degree)   | 96.09(1)                         | 95.6(0)                          | 96.77(1)                           | 95.74(1)                                       |
| $P_{cc}$ (u Å <sup>2</sup> ) | 42.80                            | 42.22                            | 43.06                              | 43.77                                          |
| $N_A/N_E$                    | 72/48                            | 31/25                            | 29/24                              | 44/38                                          |
| $\sigma$ (kHz)               | 22.4                             | 15.5                             | 16.4                               | 25.1                                           |

$P_{cc}$  is the second moment given by:

$$P_{cc} = \frac{I_b - I_a - I_c}{2}$$

<sup>a</sup>The corresponding  $F$  values for PhAc $\cdots$ CH<sub>3</sub>OH, PhAc $\cdots$ CH<sub>3</sub>OD, PhAc-D $\cdots$ CH<sub>3</sub>OH, and PhAc $\cdots$ <sup>13</sup>CH<sub>3</sub>OH are 5.27 cm<sup>-1</sup>, while the  $\rho$  value is approximately 0.004.

Table S15: Calculated harmonic and experimentally obtained vibrational frequencies ( $\text{cm}^{-1}$ ) in the O-H stretch region of  $\text{H}_2\text{O}$  and  $\text{CH}_3\text{OH}$  and their complexes with PhAc reported in references 1 and 2.

| Method                                                    | PhAc $\cdots$ CH <sub>3</sub> OH | PhAc $\cdots$ H <sub>2</sub> O        | 3-methylphenylacetylene $\cdots$ CH <sub>3</sub> OH |
|-----------------------------------------------------------|----------------------------------|---------------------------------------|-----------------------------------------------------|
| IR/UV double resonance spectroscopic results <sup>1</sup> |                                  |                                       |                                                     |
| Experiment                                                | 3615                             | 3629 <sup>a</sup> , 3724 <sup>b</sup> | ----                                                |
| Monomer                                                   | 3681                             | 3657 <sup>a</sup> , 3756 <sup>b</sup> | ----                                                |
| Theory (Ac bound)                                         | 3633                             | 3587 <sup>a</sup> , 3735 <sup>b</sup> | ----                                                |
| Theory (Ph bound)                                         | 3637                             | 3621 <sup>a</sup> , 3744 <sup>b</sup> | ----                                                |
| FTIR spectroscopic results <sup>2</sup>                   |                                  |                                       |                                                     |
| Experiment                                                | 3622                             | 3613 <sup>a</sup>                     | 3639, 3620 (2685, 2671) <sup>c</sup>                |
| Monomer                                                   | 3686                             | 3657 <sup>a</sup>                     | 3686 (2718) <sup>c</sup>                            |
| Theory (Ac bound)                                         | 3613                             | 3603 <sup>a</sup>                     | 3610 (2661)                                         |
| Theory (Ph bound)                                         | 3637                             | 3621 <sup>a</sup>                     | 3659 (2697)                                         |

<sup>a</sup>The vibrational frequencies for hydrogen-bonded O-H. <sup>b</sup>The vibrational frequencies for free O-H. <sup>c</sup>The values in the parentheses correspond to the 3-methylphenylacetylene $\cdots$ CH<sub>3</sub>OD complex.

Table S16: SAPT'2+3' interaction energy decomposition (kJ/mol) for PhAc $\cdots$ H<sub>2</sub>O and PhAc $\cdots$ H<sub>2</sub>S complexes calculated at MP2/aug-cc-pVDZ level of theory.

| Method              | Complex                        | E <sup>Electrostatic</sup><br>s | E <sup>Induction</sup> | E <sup>Dispersion</sup> | E <sup>Exchange</sup> | E <sup>Interaction</sup> |
|---------------------|--------------------------------|---------------------------------|------------------------|-------------------------|-----------------------|--------------------------|
| SAPT'2+3'           | PhAc $\cdots$ H <sub>2</sub> O | -24.9                           | -8.8                   | -15.2                   | 33.5                  | -15.5                    |
| MP2/aug-cc-<br>pVDZ | PhAc $\cdots$ H <sub>2</sub> S | -16.3                           | -5.0                   | -25.4                   | 33.6                  | -13.2                    |

## References:

- 1 P. C. Singh and G. N. Patwari, IR-UV double resonance spectroscopic investigation of phenylacetylene- alcohol complexes. Alkyl group induced hydrogen bond switching, *Journal of Physical Chemistry A*, 2008, **112**, 5121–5125.
- 2 G. Karir, N. O. B. Lüttschwager and M. A. Suhm, Phenylacetylene as a gas phase sliding balance for solvating alcohols, *Physical Chemistry Chemical Physics*, 2019, **21**, 7831–7840.

**Table S17:** Rotational constants (MHz), electric dipole moment (Debye), second moments, the binding energies ( $\Delta E$ ), and BSSE corrected binding energies ( $\Delta E_{\text{BSSE}}$ ) (kJ/mol) calculated at B3LYP-D3(BJ)/aug-cc-pVDZ level of theory.

| Parameters                   | B3LYP-D3(BJ)/aug-cc-pVDZ |                     |                     |
|------------------------------|--------------------------|---------------------|---------------------|
|                              | (M-P) <sub>Ph</sub>      | (M-P) <sub>Ac</sub> | (P-M) <sub>OH</sub> |
| $A_e$                        | 1408.6188                | 2029.7403           | 4290.2839           |
| $B_e$                        | 1111.3795                | 797.7908            | 367.0376            |
| $C_e$                        | 800.0728                 | 621.3542            | 346.3381            |
| $\mu_a$                      | 1.0                      | -1.6                | -1.4                |
| $\mu_b$                      | -1.5                     | 0.6                 | 1.2                 |
| $\mu_c$                      | 0.0                      | 1.2                 | 0.1                 |
| $P_{cc}$ (u Å <sup>2</sup> ) | 90.9                     | 34.6                | 17.8                |
| $\Delta E$                   | 20.9                     | 23.4                | 15.4                |
| $\Delta E_{\text{BSSE}}$     | 17.7                     | 20.9                | 13.5                |

$P_{cc}$  is the second moment given by: 
$$P_{cc} = \frac{I_b - I_a - I_c}{2}$$

**Table S18:** Experimental rotational Constants (MHz), centrifugal distortion constants (kHz) and second moment of A-state for PhAc $\cdots$ CH<sub>3</sub>OH complex fitted using the ASFIT program (fit includes transitions obtained from the CP-FTMW spectrometer only).

| Constants | ASFIT        |
|-----------|--------------|
| $A_0$     | 1955.3331(8) |
| $B_0$     | 796.5836(4)  |

|                              |             |
|------------------------------|-------------|
| $C_0$                        | 626.0858(4) |
| $D_J$                        | 1.13(8)     |
| $D_{JK}$                     | -6.00(2)    |
| $D_K$                        | 17.53(8)    |
| $d_I$                        | -0.144(1)   |
| $P_{cc}$ (u Å <sup>2</sup> ) | 42.85       |
| $N_A$                        | 58          |
| $\sigma$ (kHz)               | 5.4         |

---

$P_{cc}$  is the second moment given by:  $P_{cc} = \frac{I_b - I_a - I_c}{2}$
